# Supplementary material for: Risk factors and prognosis of hypoalbuminemia in surgical septic patients
Source: PeerJ journal article supplement (doi:10.7717/peerj.1267), 2015-10-01
Supplement: Fig_1.pdf [file Fig_1.pdf]

184 Patients eligible for this study

- 49 Excluded
- ◆ 28 Diabetes mellitus
  - ◆ 10 Chronic organs dysfunction
  - ◆ 3 Malnutrition
  - ◆ 7 Received albumin infusion before enrolled
  - ◆ 1 Other

135 Patients included
