# Supplementary material for: Risk factors and prognosis of hypoalbuminemia in surgical septic patients
Source: PeerJ journal article supplement (doi:10.7717/peerj.1267), 2015-10-01

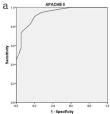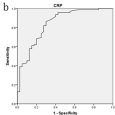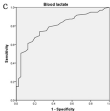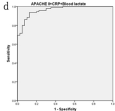

Supplement: Fig_2.pdf [file Fig_2.pdf]
