# Supplementary material for: Risk factors and prognosis of hypoalbuminemia in surgical septic patients
Source: PeerJ journal article supplement (doi:10.7717/peerj.1267), 2015-10-01
Supplement: Fig_3.pdf [file Fig_3.pdf]

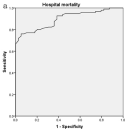

Diagonal segments are produced by ties.

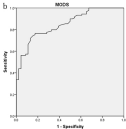

Diagonal segments are produced by ties.
