# Supplementary material for: Risk factors and prognosis of hypoalbuminemia in surgical septic patients
Source: PeerJ. 2015 Oct 1;3:e1267. doi: 10.7717/peerj.1267 (PMC4636415; doi:10.7717/peerj.1267)
Supplement: Supplemental Information 2 [file peerj-03-1267-s005.xls]

## Sheet: Day1
组	Group	Death	MODS	IAH	Repeated surgery	Vasopressor
1组 <15	1	8	8	7	3	7
2组 15-20	2	9	11	9	4	8
3组 21-25	3	14	17	18	10	10
4组 >25	4	8	9	10	7	5
总
Alb>30
P值
